# Supplementary material for: Display of functional proteins on supramolecular peptide nanofibrils using a split-protein strategy
Source: Royal Society of Chemistry journal article supplement (doi:10.1039/c7ob01057e), 2017-01-01

# Display of Functional Proteins on Supramolecular Peptide Nanofibrils Using a Split-Protein Strategy

John T. M. DiMaio, Danielle M. Raymond, and Bradley L. Nilsson\*

Department of Chemistry, University of Rochester, Rochester, New York 14627-0216, United States

## ELECTRONIC SUPPLEMENTARY INFORMATION

### Contents:

#### Experimental Details

|                                                        |    |
|--------------------------------------------------------|----|
| Peptide synthesis _____                                | S3 |
| Peptide purification and characterization _____        | S3 |
| Cleavage of RNase A to yield S Protein _____           | S4 |
| Peptide assembly and concentration determination _____ | S4 |
| Preparation of S Protein from RNase A _____            | S5 |
| Preparation of GFP 1-10 _____                          | S5 |
| Fourier Transform Infrared Spectroscopy _____          | S6 |
| Transmission Electron Microscopy _____                 | S6 |
| RNase S' Enzymatic Activity _____                      | S7 |
| Fluorescence Spectroscopy _____                        | S7 |
| Immunogold Functionalization/Microscopy _____          | S8 |

#### Figures and Tables

|                                                                                           |     |
|-------------------------------------------------------------------------------------------|-----|
| Figure S1 Chemical Structure of Peptides _____                                            | S10 |
| Table S1 Analytical HPLC purification conditions _____                                    | S11 |
| Figure S2 Analytical HPLC trace (215 nm) of Ac-(FKFE) <sub>2</sub> -NH <sub>2</sub> _____ | S11 |
| Figure S3 Analytical HPLC trace (215 nm) of S15 _____                                     | S12 |
| Figure S4 Analytical HPLC trace (215 nm) of FP1S15 _____                                  | S12 |

|                                                                                         |     |
|-----------------------------------------------------------------------------------------|-----|
| Figure S5 Analytical HPLC trace (215 nm) of S-Protein _____                             | S13 |
| Figure S6 Analytical HPLC trace (215 nm) of GFP 11 _____                                | S13 |
| Figure S7 Analytical HPLC trace (215 nm) of G11P1F _____                                | S14 |
| Table S2 Calculated and observed $m/z$ for all peptides by MALDI-TOF-MS _____           | S14 |
| Figure S8 MALDI-TOF-MS spectrum of Ac-(FKFE) <sub>2</sub> -NH <sub>2</sub> _____        | S15 |
| Figure S9 MALDI-TOF-MS spectrum of S15 _____                                            | S15 |
| Figure S10 MALDI-TOF-MS spectrum of FP1S15 _____                                        | S16 |
| Figure S11 MALDI-TOF-MS spectrum of S-Protein _____                                     | S16 |
| Figure S12 MALDI-TOF-MS spectrum of GFP 11 _____                                        | S17 |
| Figure S13 MALDI-TOF-MS spectrum of G11P1F _____                                        | S17 |
| Protein Sequences _____                                                                 | S18 |
| Figure S14 SDS-PAGE to confirm expression of GFP 1-10 _____                             | S18 |
| Figure S15 IR data of FP1S15/Ac-(FKFE) <sub>2</sub> -NH <sub>2</sub> cofibrils _____    | S19 |
| Figure S16 TEM images of fibrils _____                                                  | S20 |
| Figure S17 TEM micrographs of fibrils treated with S-protein _____                      | S21 |
| Figure S18 Kinetics of hydrolysis of 1 mM cCMP _____                                    | S22 |
| Figure S19 Kinetics of hydrolysis of 2 mM cCMP _____                                    | S22 |
| Figure S20 Kinetics of hydrolysis of 3 mM cCMP _____                                    | S23 |
| Figure S21 Kinetics of hydrolysis of 4 mM cCMP _____                                    | S23 |
| Figure S22 Kinetics of hydrolysis of 5 mM cCMP _____                                    | S24 |
| Figure S23 Kinetics of hydrolysis of cCMP by 1 $\mu$ M RNase S' _____                   | S24 |
| Figure S24 TEM micrographs of fibrils with S-protein and AB-AuNP _____                  | S25 |
| Figure S25 Representative TEM micrographs of G11P1F fibrils treated with GFP 1-10 _____ | S26 |
| Figure S26 TEM micrographs of fibrils with GFP 1-10 and AB-AuNP _____                   | S26 |

## Experimental Details

### Peptide Synthesis

Ac-(FKFE)<sub>2</sub>-NH<sub>2</sub>, S15, FP1S15, GFP 11, and G11P1F were synthesized as *C*-terminal amides using Rink amide resin (Advanced ChemTech) using Fmoc synthesis on a microwave equipped CEM Liberty Peptide synthesizer utilizing DIC/HOBt activation. S15 was synthesized as the *C*-terminal acid using Wang resin (Advanced ChemTech) using Fmoc synthesis also on the CEM Liberty with DIC/HOBt activation. Peptides were acetylated (except S15) using 20% Ac<sub>2</sub>O. Peptides were cleaved and deprotected from resin using standard cleavage conditions of trifluoroacetic acid, triisopropyl silane, and water (95 : 2.5 : 2.5). The collected supernatant was evaporated to roughly 0.5 mL and precipitated using cold (-78 °C) diethyl ether. The resulting solid was pelleted by centrifugation and the supernatant was decanted and the resulting peptide pellet was dissolved in DMSO and purified via preparatory HPLC. Peptides were characterized via MALDI-TOF-MS and purity was assessed by analytical HPLC.

### Peptide Purification and Characterization

Purification of peptides was performed by reverse phase HPLC with a Shimadzu 6AD, equipped with a Phenomenex Gemini 10 micron C18 Axia column, 250 x 21.5 mm with a guard column. A gradient of water and acetonitrile (0.1% TFA) was used at a rate of 10 mL/min and eluent was monitored via UV at 215 and 254 nm. Collected fractions were assessed with analytical HPLC using a Shimadzu 2010A, equipped with a Phenomenex Gemini 5 micron C18 column, 250 x 4.6 mm with a guard column. Pure fractions were analyzed by MALDI-TOF-MS to determine correct products. Pure peptides were frozen and lyophilized to yield powders.

### **Cleavage of RNase A to yield S protein**

A 2% solution of RNase A from bovine pancreas (Type 1-A, powder,  $\geq 60\%$  RNase A basis, Sigma-Aldrich) was prepared in 100 mM Tris (pH = 8). The solution was chilled to 0 °C and 40  $\mu\text{L}$  a 1% solution of protease from *Bacillus licheniformis* (subtilisin) (Type VIII, lyophilized powder 7 units/mg solid, Sigma-Aldrich) in the same buffer was added dropwise. This was allowed to stir at 0 °C for 15 hours. The reaction was quenched with enough 3M HCl to bring the pH to 4. The resulting solution was immediately purified via RP HPLC.

### **Peptide Assembly and Concentration Determination**

S15 concentration was determined using UV absorbance and the extinction coefficient  $299 \text{ M}^{-1} \text{ cm}^{-1}$  at 280 nm. Concentration of S-pro was determined using UV absorbance and an extinction coefficient of  $9055 \text{ M}^{-1} \text{ cm}^{-1}$  at 280 nm. Concentrations of synthesized peptides were determined by correlation to an HPLC concentration curve calibrated by amino acid analysis (AIBioTech, Richmond, VA) after being dissolved in a mixture of acetonitrile/water. Assembly of  $\text{Ac}-(\text{FKFE})_2\text{-NH}_2$  was induced via dissolution of lyophilized powders in unbuffered water (for use in CD or IR experiments) or 20 mM Bis TRIS with 1 mM EDTA (pH = 6.01) (for use in TEM and kinetics experiments). To coassemble FP1S15 with  $\text{Ac}-(\text{FKFE})_2\text{-NH}_2$ , peptides were mixed in acetonitrile/water at varying mole percents of FP1S15 (0.1%, 0.5%, 1.0%, 2.5%, 5.0%, and 10%) relative to  $\text{Ac}-(\text{FKFE})_2\text{-NH}_2$  and then lyophilized to powders and then dissolved in either unbuffered water (for use in CD or IR experiments) or 20 mM Bis TRIS with 1 mM EDTA (pH = 6.01) (for use in TEM and kinetics experiments) to induce assembly. To coassemble G11P1F with  $\text{Ac}-(\text{FKFE})_2\text{-NH}_2$  peptides were mixed in acetonitrile/water at varying mole percent of G11P1F (5%, 10%, 15%, 20%, 25%, and 50%), lyophilized, and then dissolved in unbuffered water to assemble.



## Preparation of S Protein from RNase A

A 2% solution of RNase A from bovine pancreas (Type 1-A, powder,  $\geq 60\%$  RNase A basis, Sigma-Aldrich) was prepared in 100 mM Tris (pH = 8). The solution was chilled to 0 °C and 40  $\mu$ L of a 1% solution of protease from *Bacillus licheniformis* (subtilisin) (Type VIII, lyophilized powder 7 units/mg solid, Sigma-Aldrich) in the same buffer was added dropwise. This was allowed to stir at 0 °C for 15 hours. The reaction was quenched by addition of 3 M HCl to adjust the pH to 4. The resulting material was immediately purified via reverse phase HPLC to provide the S-protein.

## Preparation of GFP 1-10

A pET-15b plasmid encoding for N-terminal histidine tagged GFP 1-10 was provided by Steven G. Boxer and coworkers from Stanford University.<sup>1</sup> GFP 1-10 was expressed in *E. coli* using a BL21(DE3) cell line and purified through a Ni-NTA affinity column (Fisher Scientific) by anion exchange chromatography using a BioRad DuoFlow FPLC system with UV/Vis detector and automated fraction collector. The purification was performed under denaturing conditions (8 M urea, 5 mM DTT) using a wash buffer containing 20 mM imidazole and an elution buffer containing 300 mM imidazole. Fractions containing purified protein were filtered using a Milipore Amicon Pro Affinity Concentrator (10 Kd cutoff) and stored in a 1.5 mL Eppendorf tube at -80°C until needed. The stock concentration was determined by absorbance at 280 nm using Beer-Lambert's law (where  $l = 1$  cm and  $\Delta\epsilon_{280}$  GFP 1-10 = 17,545 cm<sup>-1</sup> M<sup>-1</sup> as calculated by ExPASy ProtParam tool). SDS-PAGE was used to confirm the expression of GFP 1-10 (26,486 g/mol) and run against a dual color precision plus protein standard (BioRad).

(1) Kent, K. P.; Childs, W.; Boxer, S. G. *J. Am. Chem. Soc.* **2008**, *130*, 9664.

## **Fourier Transform Infrared Spectroscopy**

To remove residual TFA after HPLC purification, counterion exchange was performed by dissolving peptides in 40 : 90 : 1 mixture of acetonitrile : water : HCl solution, samples were frozen and then lyophilized. The resulting powders were twice dissolved in D<sub>2</sub>O and lyophilized to remove any residual water. The dry powders were dissolved in D<sub>2</sub>O and allowed to stand for 2 hours to ensure complete fibril formation. FTIR spectra were obtained with a Shimadzu 8400 Fourier transform-infrared spectrophotometer. The spectra were obtained with a 2 cm<sup>-1</sup> resolution, Happ-Ganzel apodization, and 512 in a 0.1 mm pathlength CaF<sub>2</sub> cell.

## **Transmission Electron Microscopy**

10 µL of sample was pipetted onto a 200 mesh carbon coated copper grid and allowed to stand for 1 minute. Residual solvent was wicked off via capillary action with filter paper and the grids were quickly washed for 1 second with unbuffered water, which was then wicked away by capillary action. Grids were then stained with 10 µL of uranyl acetate for 1 minute, which was wicked away with capillary action. Grids were then allowed to air dry for 5 minutes. Images were obtained on a Hitachi 7650 transmission electron microscope with an accelerating voltage of 80 kV.

## **Hydrolysis of cCMP by RNase S'**

Kinetic data were measured by following the hydrolysis of cytidine 2', 3'-cyclic monophosphate (cCMP, Sigma-Aldrich) on a Shimadzu UV-2401PC spectrometer. Fibril was mixed with cCMP and the appropriate amount of 20 mM Bis-Tris, 1 mM EDTA, thus [fibril] = 100 µM and [cCMP] = 1 mM, 2 mM, 3 mM, 4 mM or 5 mM. To this solution, S-Pro in the same buffer solution was added to give [S-Pro] = 1 µM. Immediately following addition of S-Pro, the

solution was transferred to a 1 mm quartz cuvette and UV absorption at 286 nm was recorded every 0.4 second for 10 minutes. Fibrils used were Ac-(FKFE)<sub>2</sub>-NH<sub>2</sub>, 0.1% FP1S15, 0.5% FP1S15, 1.0% FP1S15, 2.5% FP1S15, 5.0% FP1S15, and 10.0% FP1S15. Control experiments were also performed in which the hydrolysis of cCMP was observed with just Ac-(FKFE)<sub>2</sub>-NH<sub>2</sub> and FP1S15 functionalized fibril in the absence of S-Pro. These data were not subtracted from the presented data because there was no observed hydrolysis.

### **Fluorescence Spectroscopy**

Fluorescence intensity was monitored for solutions of G11P1F at varying mole percent (5%, 10%, 15%, 20%, 25%, and 50%) relative to Ac-(FKFE)<sub>2</sub>-NH<sub>2</sub> using a Tecan Infinite M1000 plate reader. G11P1F/Ac-(FKFE)<sub>2</sub>-NH<sub>2</sub> solutions (total [fibril] = 130  $\mu$ M) were aliquoted from acetonitrile/water and frozen and lyophilized. The resulting powder was reconstituted in 37.5  $\mu$ L of unbuffered water and allowed to assemble for 24-48 hours to ensure fibril formation. To this solution, 37.5  $\mu$ L of naturing buffer was added (50 mM Tris·HCl, 100 mM NaCl, 10% glycerol) bringing total [fibril] = 65  $\mu$ M followed by addition of 1.2 mole equivalent GFP 1-10 relative to G11P1F. Stocks of GFP 1-10 were stored in denaturing buffer (8 M urea and 5 mM DTT) after protein purification and stored at -80°C. This solution was allowed to thaw (on ice) and dilutions were made as necessary to ensure a 25 times volume dilution of denaturing buffer upon mixing with G11P1F solutions. The GFP 1-10 was then allowed to complex to G11P1F for 24 hours before measuring GFP fluorescence. A control was prepared using equimolar GFP 1-10 relative to the 50% G11P1F solution in 50% H<sub>2</sub>O/naturing buffer containing no G11P1F. A second control was prepared using equimolar GFP 1-10 relative to the 50% G11P1F solution followed by addition of excess synthetic GFP 11 (not attached to Ac-(FKFE)<sub>2</sub>-NH<sub>2</sub> fibrils). The solutions were prepared directly in a 96 well plate (Greiner, 96 well, flat bottom, black) and the

fluorescence measurements were taken using the following parameters: excitation = 400 nm, emission scan = 410-600 nm, bandwidth = 5 nm. Solutions were prepared the same way using 200  $\mu$ L volumes directly into half dram glass vials for imaging purposes.

### **Immunogold Functionalization/Microscopy**

Rabbit anti-ribonuclease A antibody (Abcam, US) was functionalized using a Gold ABConjugation Kit (AppliChem, Germany). Briefly, 20 mL of “conjugation buffer” was placed in a 50 mL centrifuge tube. To this 2.5 mL of the gold nanoparticle (AuNP’s) solution was added. 2  $\mu$ L of the 0.2 mg mL<sup>-1</sup> stock of IgG anti-RNase A antibody was diluted to 200  $\mu$ L with conjugation buffer to make a solution with [antibody] = 20  $\mu$ g/mL and this was added to the mixture of conjugation buffer and AuNP’s. This solution was carefully mixed by inversion 3x and allowed to incubate at room temperature for 15 minutes. 1.25 mL of “blocking solution” was added and this was mixed and again allowed to incubate for 15 minutes. 250  $\mu$ L of “stabilization solution” was added and mixed; this was allowed to incubate for 30 minutes at room temperature. To this, 375  $\mu$ L of “neutralization solution” was added and mixed and the solution was allowed to incubate for 5 minutes. Finally, 0.75 mL of 30% glycerol in water was added and mixed into the solution. The solution was then centrifuged for 30 minutes, at 7000 g and 20 °C. The supernatant was carefully removed and the pellet was suspended in 1 mL of “storage buffer.” Each of the previously mentioned buffers is included in the kit.

Goat anti-GFP antibody (Abcam, US) was functionalized with 40 nm gold particles using a Gold Conjugation Kit (Abcam, US). After the kit components warmed to room temperature, a 0.1 mg/mL antibody stock was prepared using the “gold antibody diluent”. To a 1.5 mL Eppendorf tube 42  $\mu$ L of “gold reaction buffer” was added followed by 12  $\mu$ L of the antibody stock. The solution was mixed thoroughly by gentle inversion. Next, 45  $\mu$ L of this mixture was

added to one vial of freeze dried gold and the powder was reconstituted by pipetting up and down. This mixture sat at room temperature for 10 minutes. Finally, 5  $\mu\text{L}$  of “EL gold quencher” was added to the solution and mixed gently by pipetting up and down to provide 50  $\mu\text{L}$  of 20 OD AuNP-antibody conjugate.

To attain micrographs of fibrils treated the antibody functionalized gold nanoparticles (AB-AuNP's), 30  $\mu\text{L}$  solutions of 200  $\mu\text{M}$  fibril with 20  $\mu\text{M}$  S-Pro were prepared. The fibrils were allowed to grow for 1 day to ensure mature fibril growth, and the S-Pro was allowed to complex for 30 minutes. 10  $\mu\text{L}$  was then taken and spotted on a TEM grid as described in the previous section. To the remaining 20  $\mu\text{L}$ , 1  $\mu\text{L}$  of AB-AuNP's were added carefully mixed via pipette. This solution was allowed to stand for 20 minutes, and then spotted as previously described. 100  $\mu\text{M}$  Solutions of G11P1F/Ac-(FKFE)<sub>2</sub>-NH<sub>2</sub> were assembled for 1-2 days to ensure mature fibril growth followed by GFP 1-10 complexation for 1 day. 1  $\mu\text{L}$  of the GFP AB-AuNP stock was added and TEM spotting proceeded as previously described.

**Figure S1** Primary Structure of Peptides synthesized via SPPS.

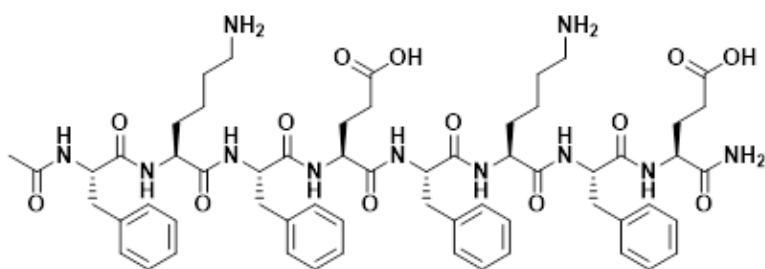

**Ac-(FKFE)<sub>2</sub>-NH<sub>2</sub>**

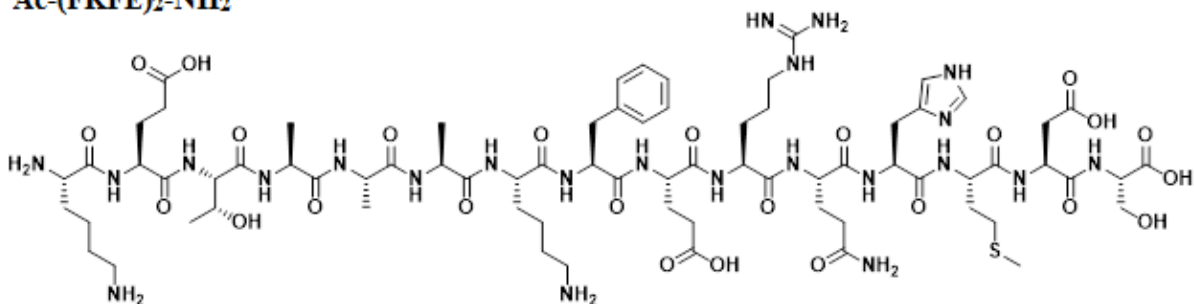

**\$15**

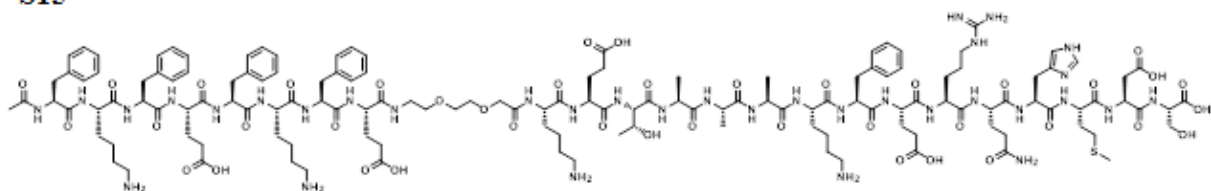**FP1S15**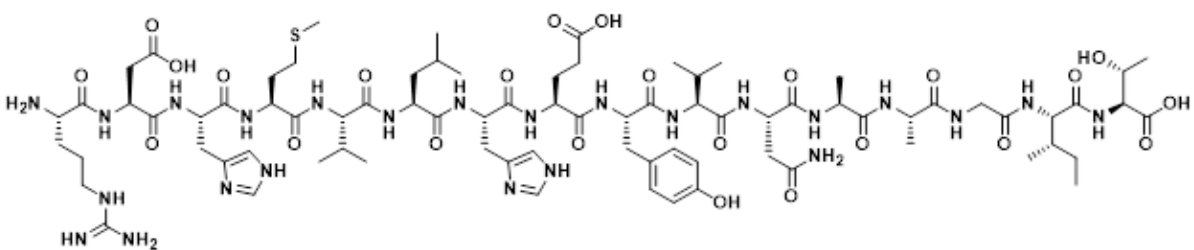

**GFP 11**

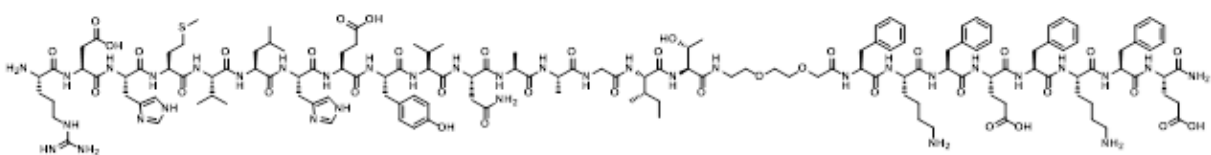

## G11P1F

**Table S1** Analytical HPLC purification conditions.

| Peptide                                 | R <sub>t</sub> (min) | Gradient (solution A: water/0.5% TFA; solution B: acetonitrile/0.5% TFA) |
|-----------------------------------------|----------------------|--------------------------------------------------------------------------|
| Ac-(FKFE) <sub>2</sub> -NH <sub>2</sub> | 12.076               | Isocratic 5% B 5 min, 5–95% B over 10 min, 95% B 5 min                   |
| S15                                     | 10.632               | Isocratic 5% B 5 min, 5–95% B over 10 min, 95% B 5 min                   |
| FP1S15                                  | 12.100               | Isocratic 5% B 5 min, 5–95% B over 10 min, 95% B 5 min                   |
| S-protein                               | 11.521               | Isocratic 5% B 5 min, 5–95% B over 10 min, 95% B 5 min                   |
| GFP 11                                  | 11.113               | Isocratic 5% B 5 min, 5–95% B over 10 min, 95% B 5 min                   |
| G11P1F                                  | 11.725               | Isocratic 5% B 5 min, 5–95% B over 10 min, 95% B 5 min                   |

**Figure S2** Analytical HPLC trace (215 nm) of Ac-(FKFE)<sub>2</sub>-NH<sub>2</sub>

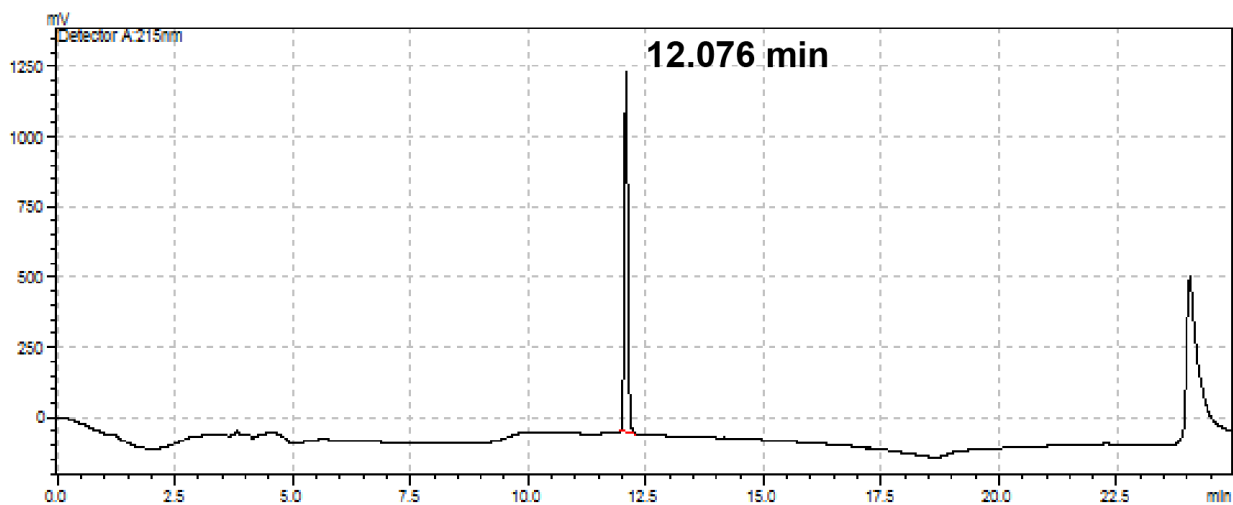

**Figure S3** Analytical HPLC trace (215 nm) of S15

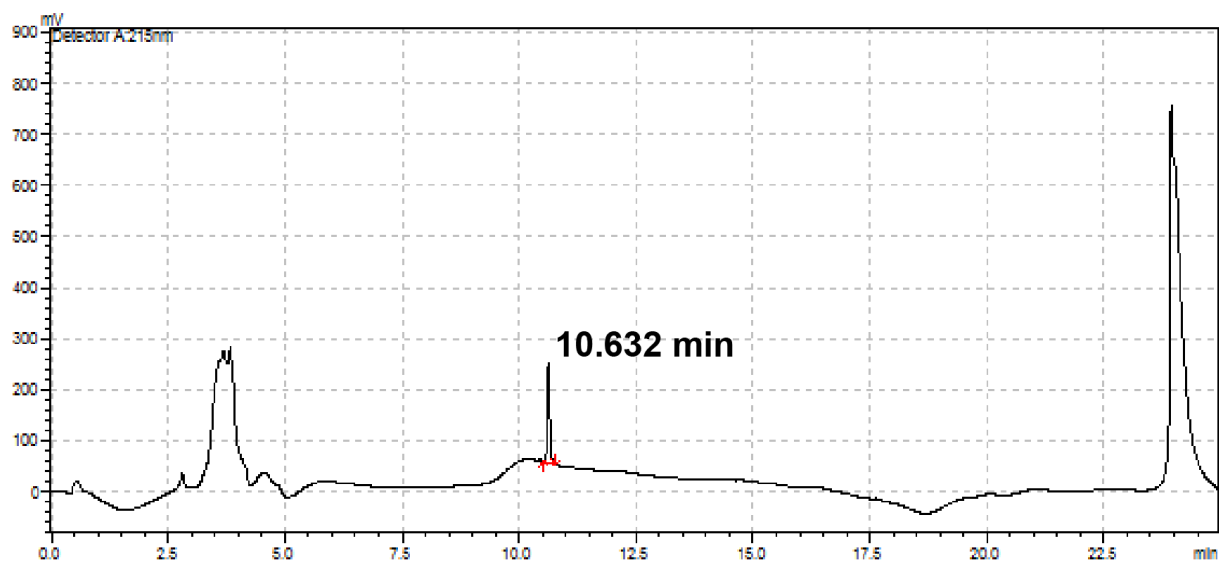

**Figure S4** Analytical HPLC trace (215 nm) of FP1S15

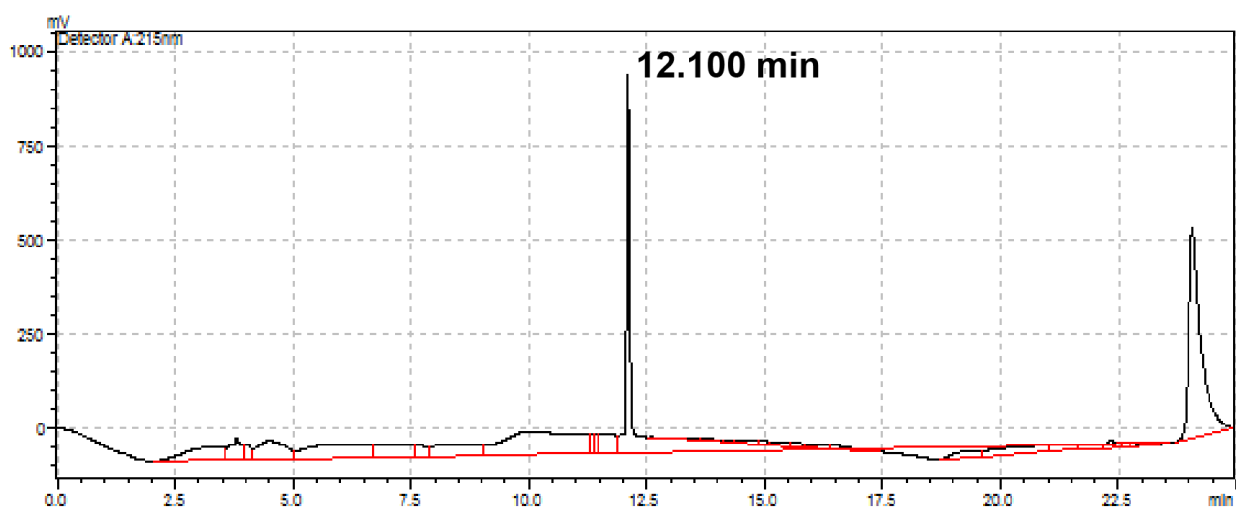



**Figure S5** Analytical HPLC trace (215 nm) of S-Protein

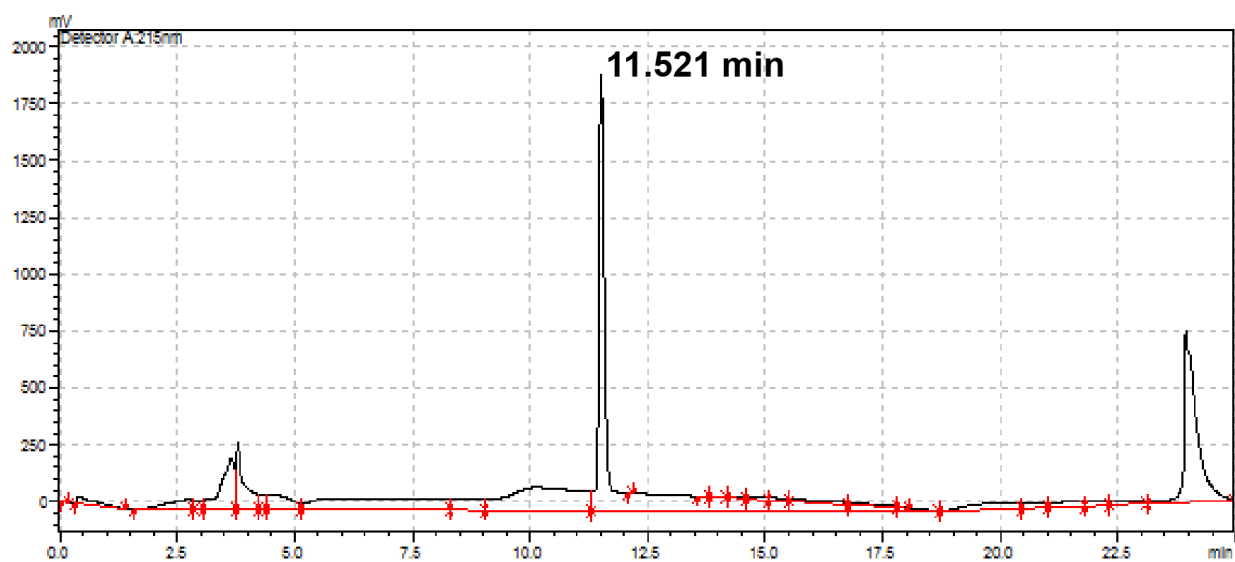

**Figure S6** Analytical HPLC trace (215 nm) of GPF 11

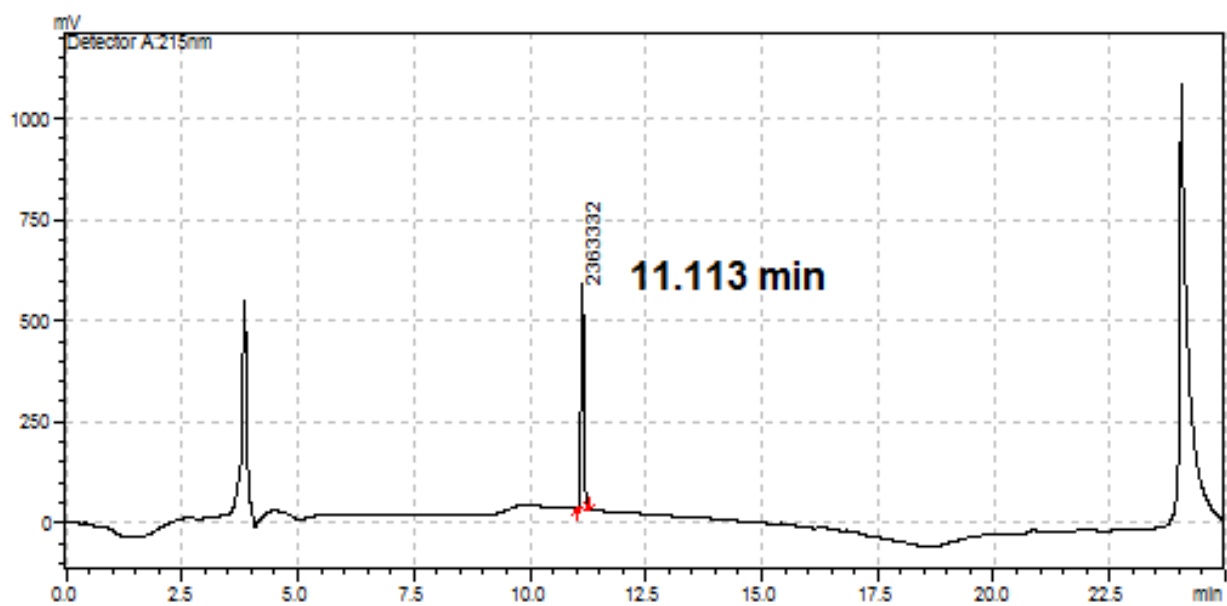

**Figure S7** Analytical HPLC trace (215 nm) of G11P1F

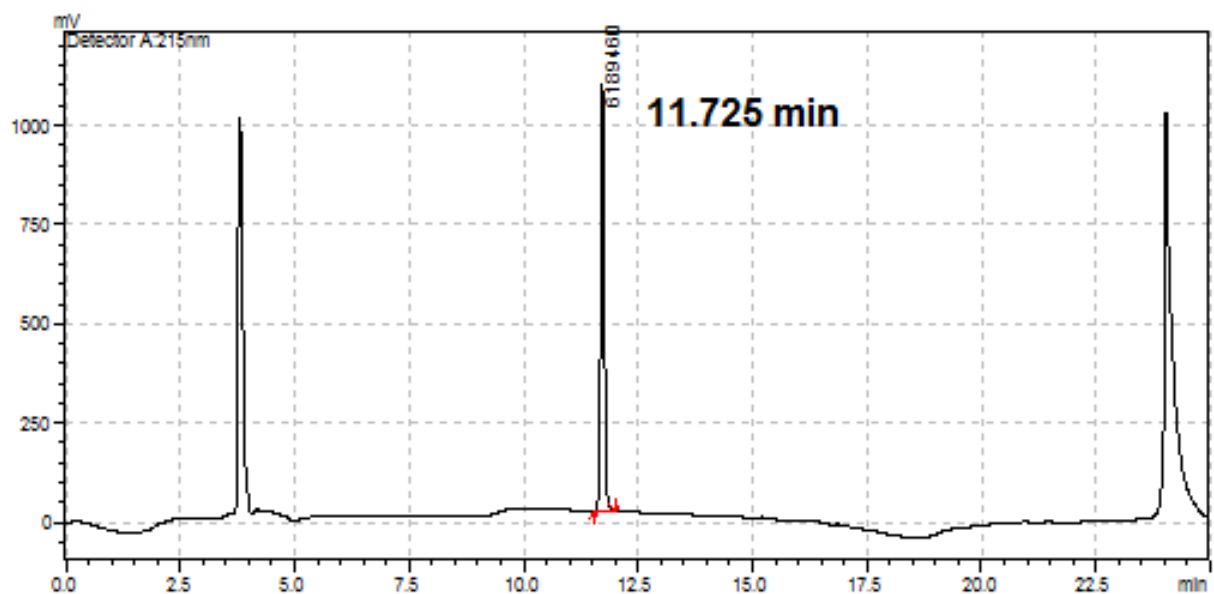

**Table S2** Calculated and observed  $m/z$  for all peptides by MALDI-TOF-MS

| Peptide                                 | Calc [ $\text{MH}^+$ ] | Obs [ $\text{MH}^+$ ] | Calc [ $\text{MNa}^+$ ] | Obs [ $\text{MNa}^+$ ] |
|-----------------------------------------|------------------------|-----------------------|-------------------------|------------------------|
| Ac-(FKFE) <sub>2</sub> -NH <sub>2</sub> | 1162.59                | 1162.981              | 1184.58                 | 1184.966               |
| S15                                     | 1748.83                | 1747.84               | 1770.82                 | 1769.911               |
| FP1S15                                  | 3037.46                | 3040.968              | 3060.45                 | --                     |
| S-protein                               | 11535.32               | 11527.436             | 11557.31                | --                     |
| GFP 11                                  | 1825.89                | 1826.269              | 1847.88                 | --                     |
| G11P1F                                  | 3072.53                | 3072.248              | 3094.52                 | 3092.349               |

**Figure S8** MALDI-TOF-MS spectrum of Ac-(FKFE)<sub>2</sub>-NH<sub>2</sub>

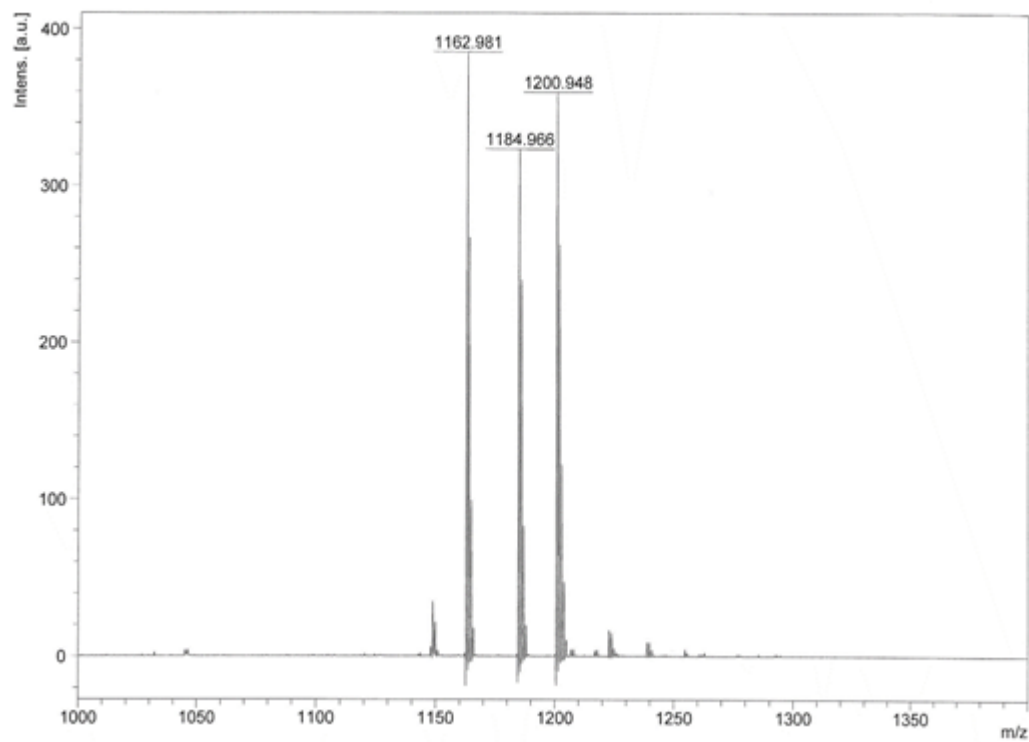

**Figure S9** MALDI-TOF-MS spectrum of S15

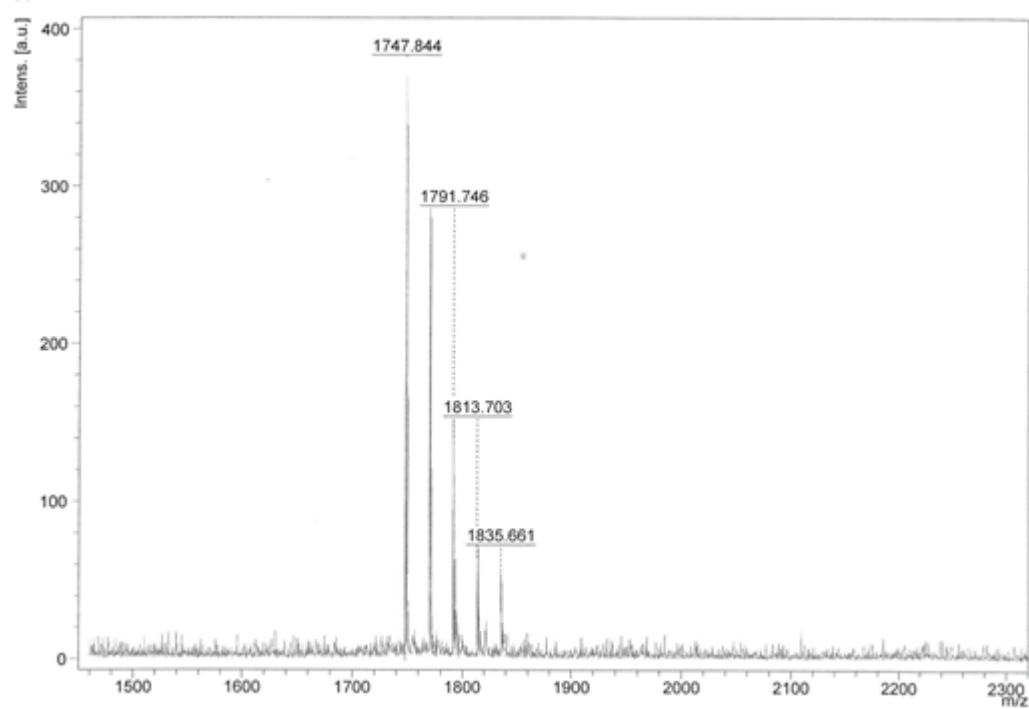

**Figure S10** MALDI-TOF-MS spectrum of FP1S15

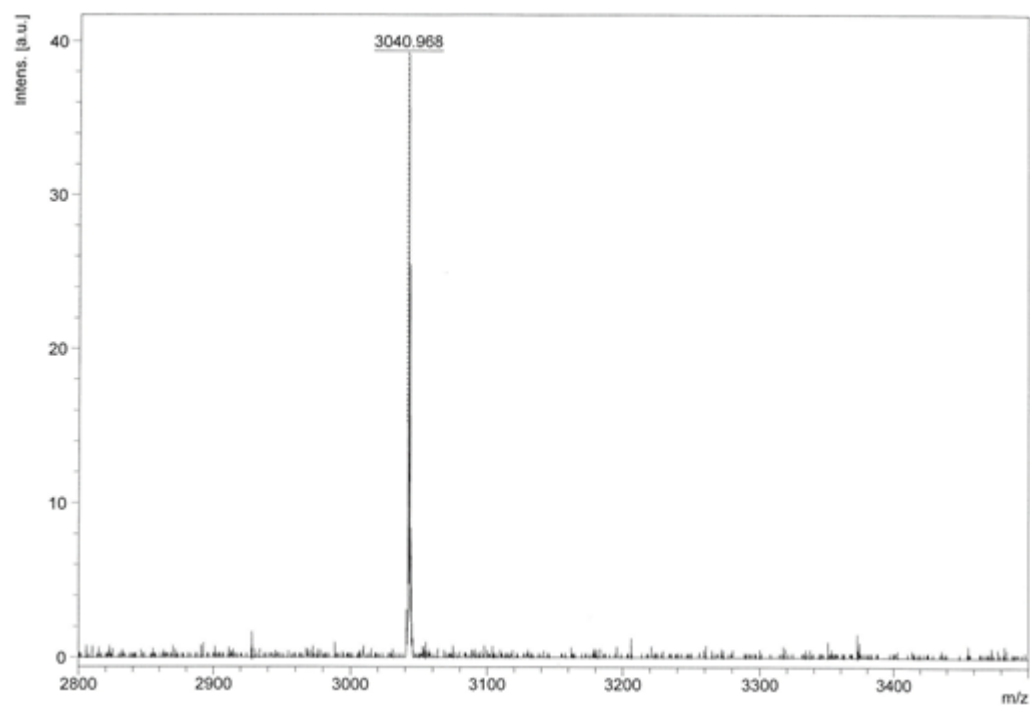

**Figure S11** MALDI-TOF-MS spectrum of S-Protein

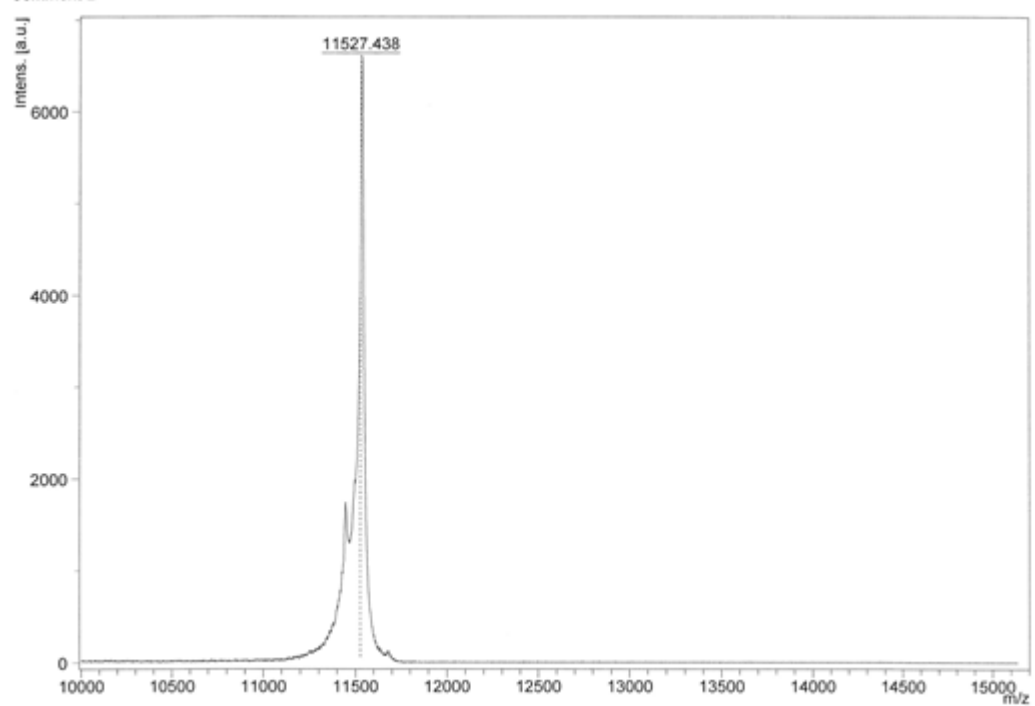

**Figure S12** MALDI-TOF-MS spectrum of GFP 11

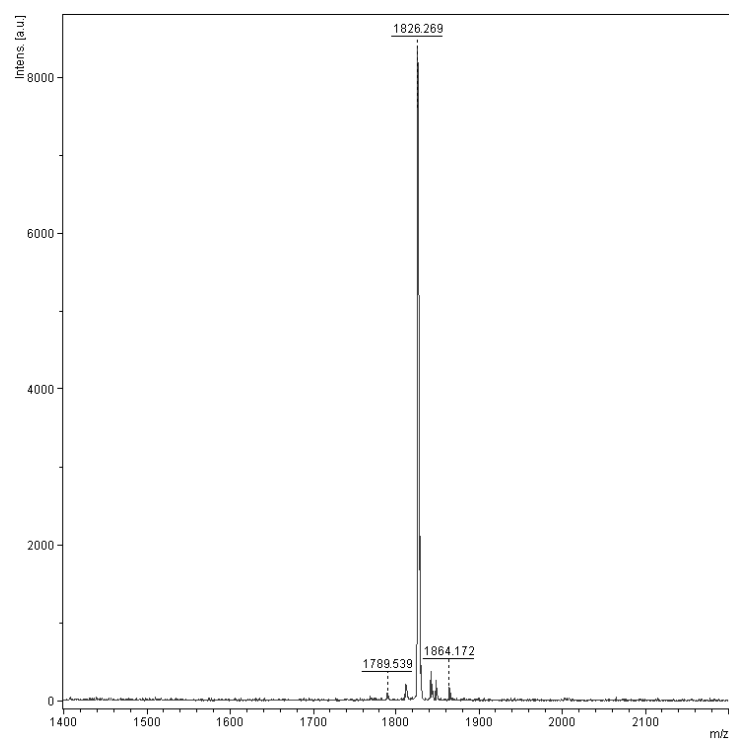

**Figure S13** MALDI-TOF-MS spectrum of G11P1F

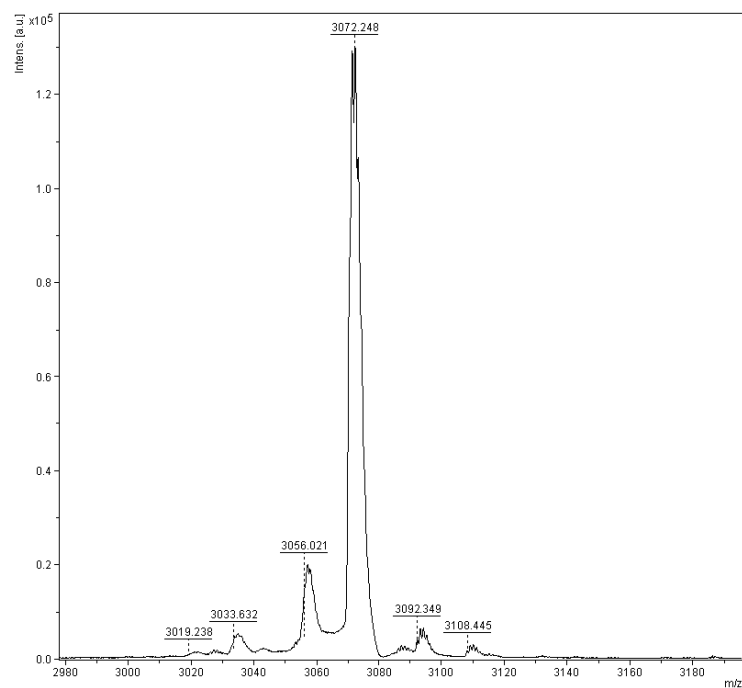

## Protein Sequences

### S-Protein:

SSSNYCNQMMKSRNLTKDRCKPVNTFVHESLADVQAVCSQKNVACKNGQTNCYQSYS  
TMSITDCRETGSSKYPNCAYKTTQANKHIIVACEGNPYVPVHFDASV

### GFP 1-10:

GSSHHHHHHSSGLVPRGSHMGGTSSKGEELFTGVVPILVELDGDVNGHKFSVRGEGEG  
DATIGKLTCLKFICTTGKLPVPWPTLVTTLSYGVQCFSRYPDHMKRHDFFKSAMPEGYVQ  
ERTISFKDDGKYKTRAVVKFEGDTLVNRIELKGTDFKEDGNILGHKLEYNFNSHNVYIT  
ADKQKNGIKANFTVRHNVEDGSVQLADHYQQNTPIGDGPVLLPDNHYLSTQTVLSKDP  
NEKGT

**Figure S14** SDS-PAGE to confirm expression of GFP 1-10 with mass of 26,486 g/mol

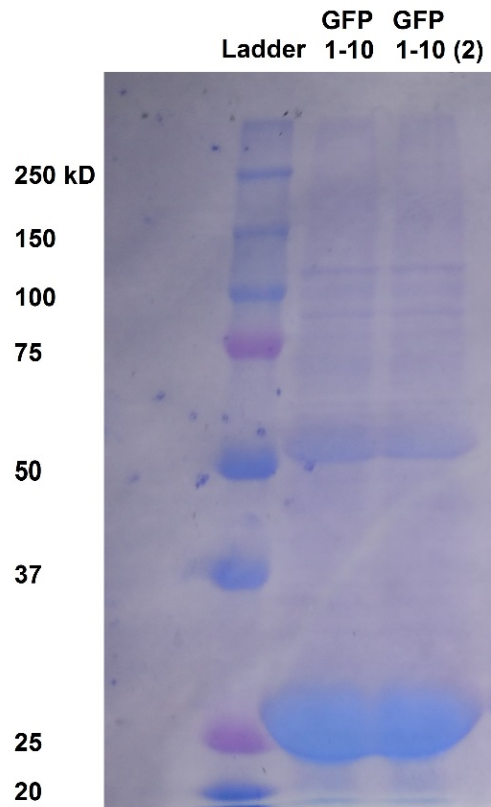

**Figure S15 IR data of FP1S15/Ac-(FKFE)<sub>2</sub>-NH<sub>2</sub> cofibrils where [peptide] = 500  $\mu$ M. (A) Ac-(FKFE)<sub>2</sub>-NH<sub>2</sub> (B) 0.1% FP1S15 (C) 0.5% FP1S15 (D) 1.0% FP1S15 (E) 2.5% FP1S15 (F) 5.0% FP1S15 (G) 10.0% FP1S15**

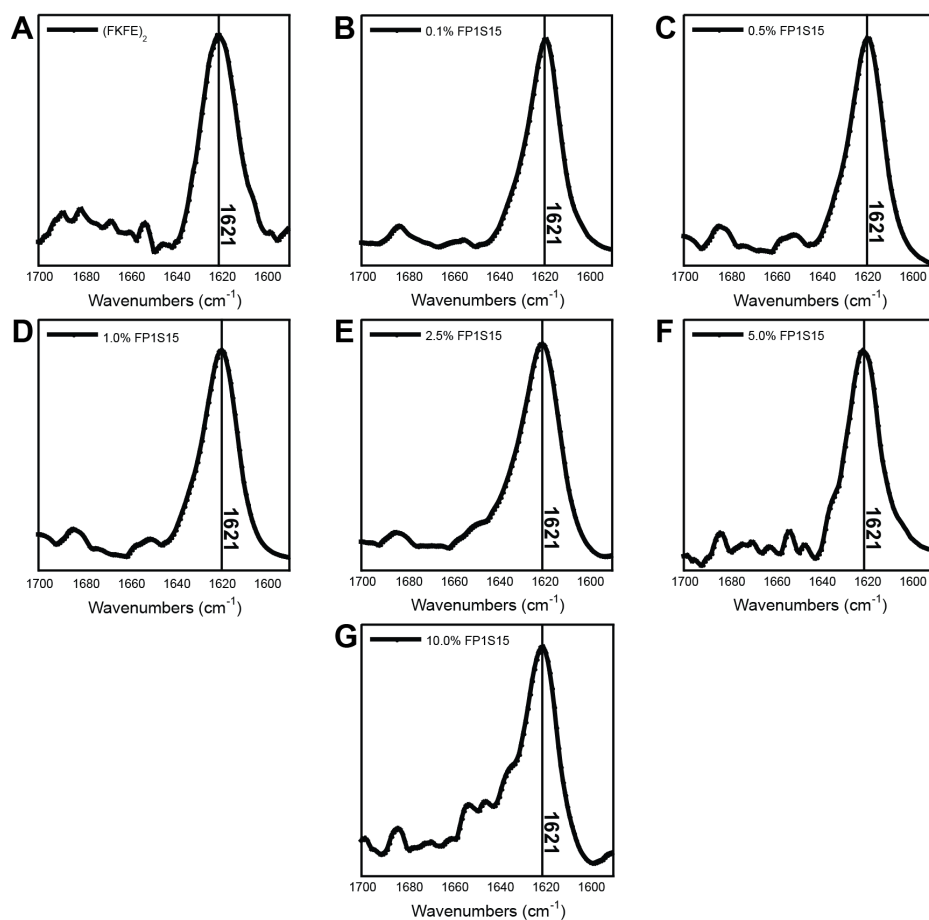

**Figure S16 TEM images of fibrils. [total peptide] = 250  $\mu$ M. (A) Ac-(FKFE)<sub>2</sub>-NH<sub>2</sub> (B) 0.1% FP1S15 (C) 0.5% FP1S15 (D) 1.0% FP1S15 (E) 2.5% FP1S15 (F) 5.0% FP1S15 (G) 10.0% FP1S15**

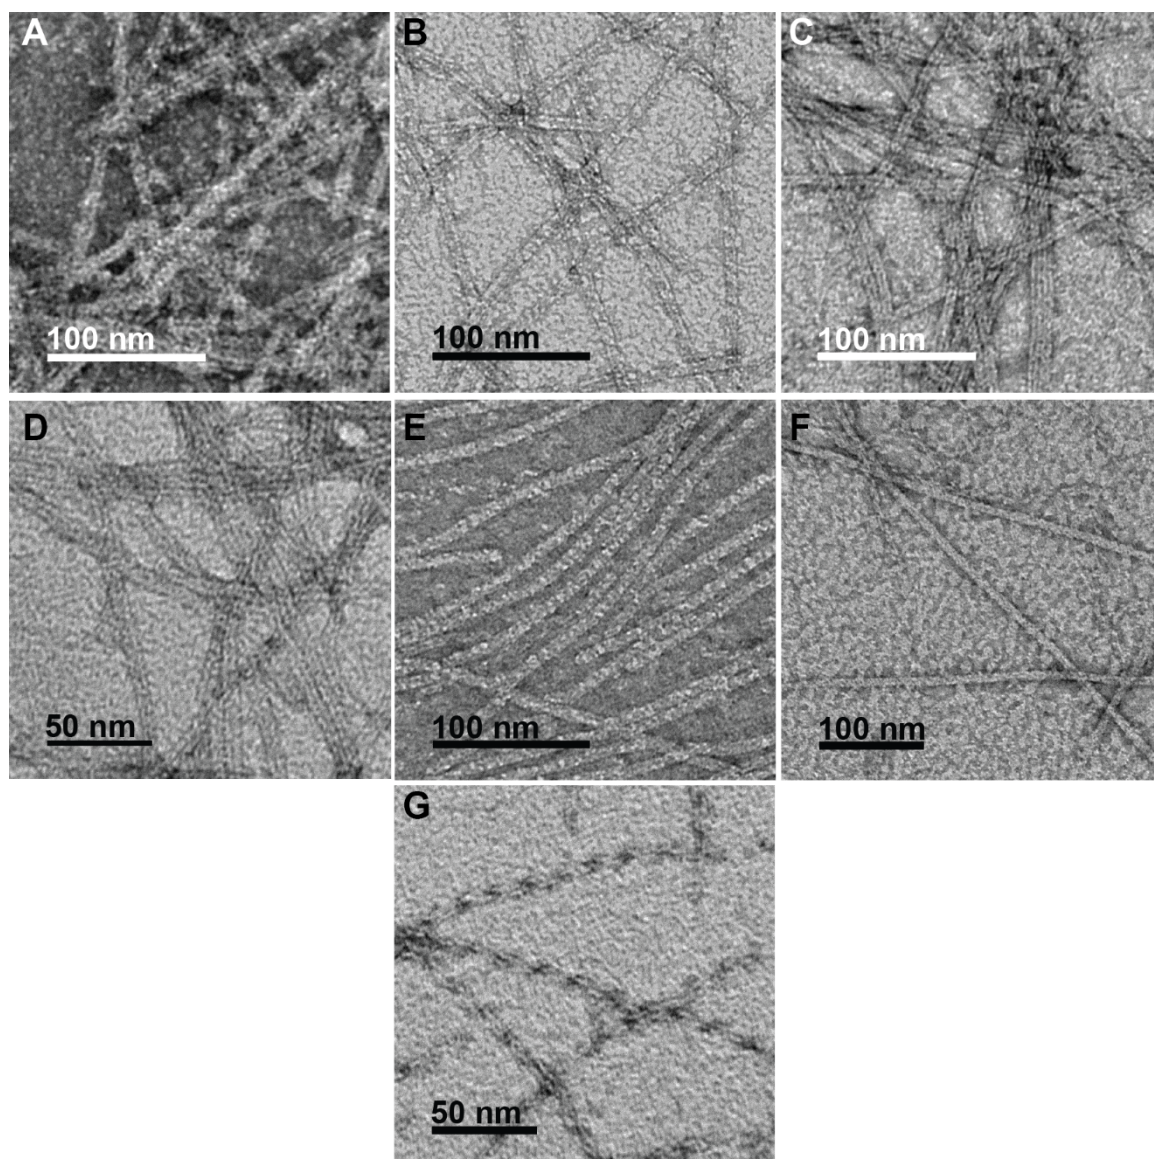



**Figure S17 TEM micrographs of fibrils treated with S-protein. [Total peptide] = 200  $\mu$ M, [S-Pro] = 20  $\mu$ M (A) Ac-(FKFE)<sub>2</sub>-NH<sub>2</sub> (B) 0.1% FP1S15 (C) 0.5% FP1S15 (D) 1.0% FP1S15 (E) 2.5% FP1S15 (F) 5.0% FP1S15 (G) 10.0% FP1S15**

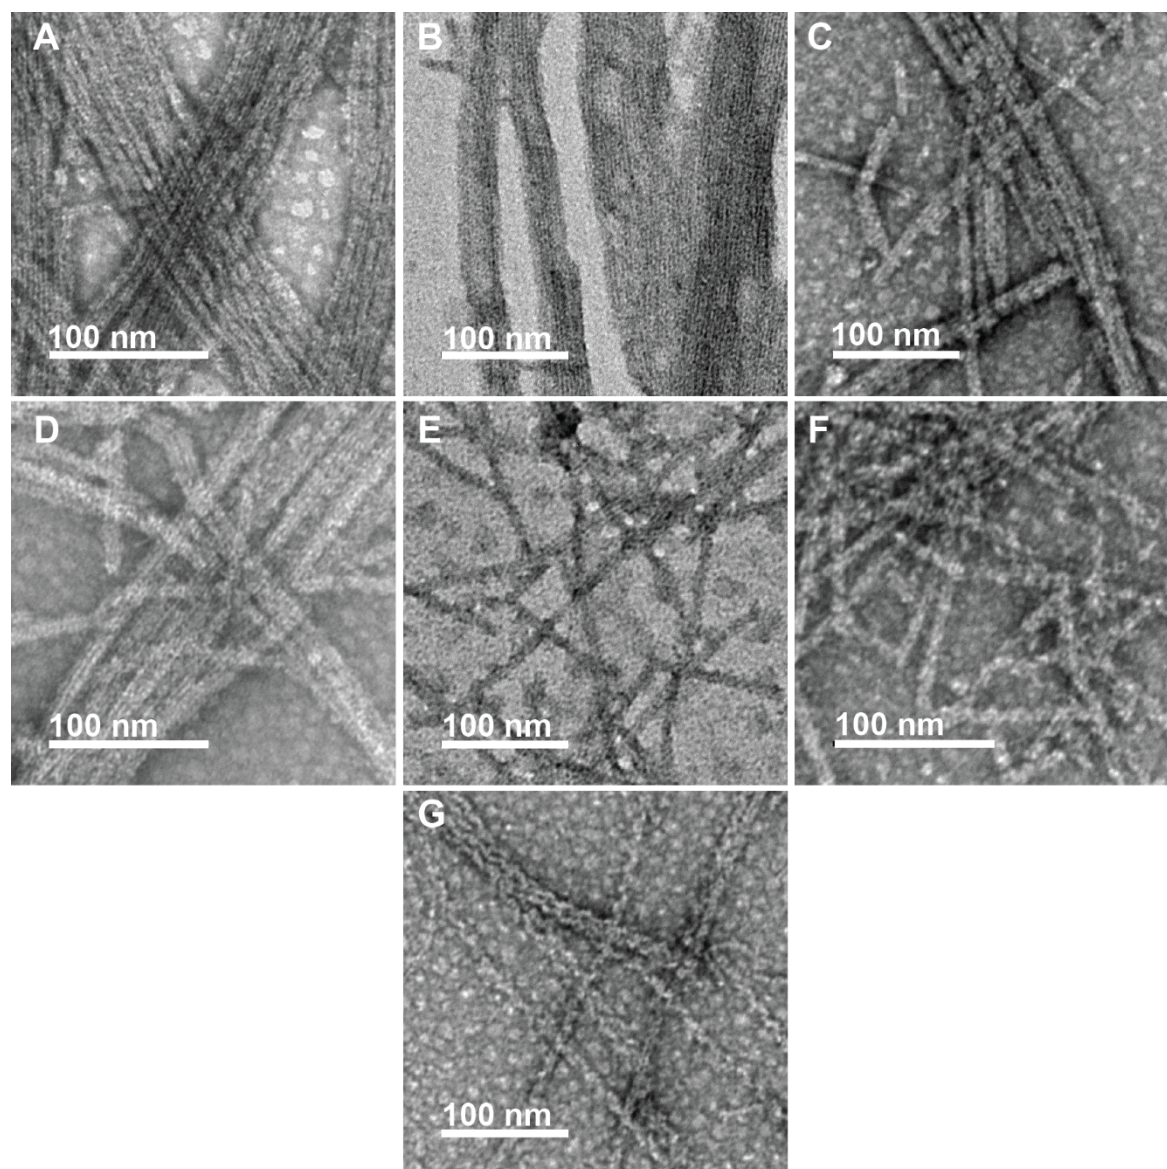

**Figure S18** Kinetics of hydrolysis of 1 mM cCMP. Total [fibril] = 100  $\mu$ M, [S-protein] = 1  $\mu$ M, [RNase S'] = 1  $\mu$ M

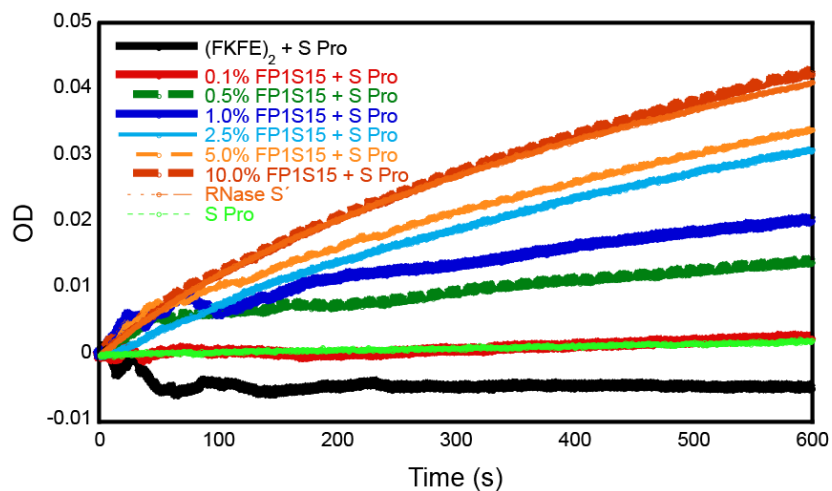

**Figure S19** Kinetics of hydrolysis of 2 mM cCMP. Total [fibril] = 100  $\mu$ M, [S-protein] = 1  $\mu$ M, [RNase S'] = 1  $\mu$ M

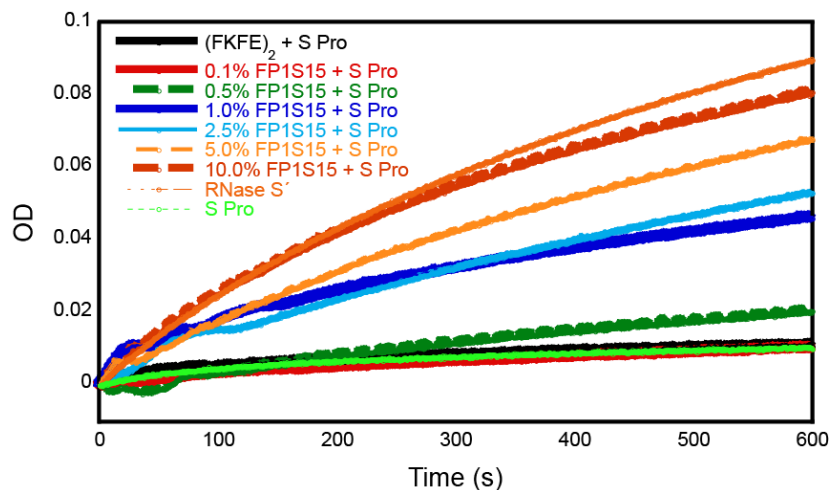

**Figure S20** Kinetics of hydrolysis of 3 mM cCMP. Total [fibril] = 100  $\mu$ M, [S-protein] = 1  $\mu$ M, [RNase S'] = 1  $\mu$ M

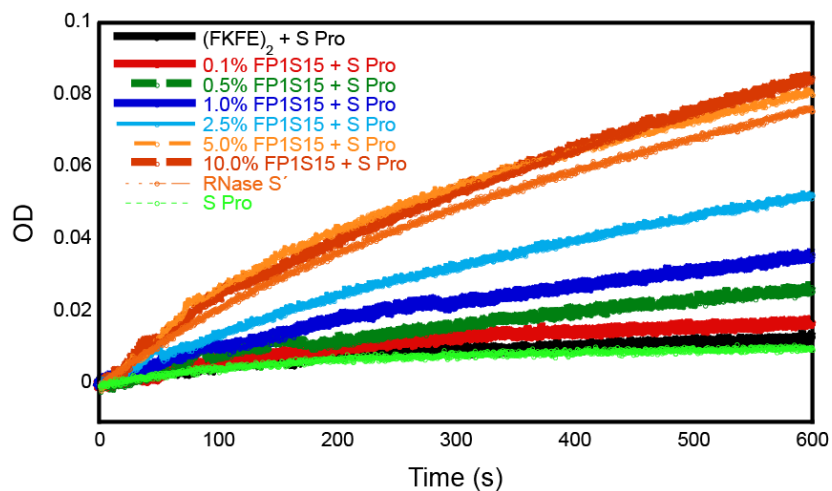

**Figure S21** Kinetics of hydrolysis of 4 mM cCMP. Total [fibril] = 100  $\mu$ M, [S-protein] = 1  $\mu$ M, [RNase S'] = 1  $\mu$ M

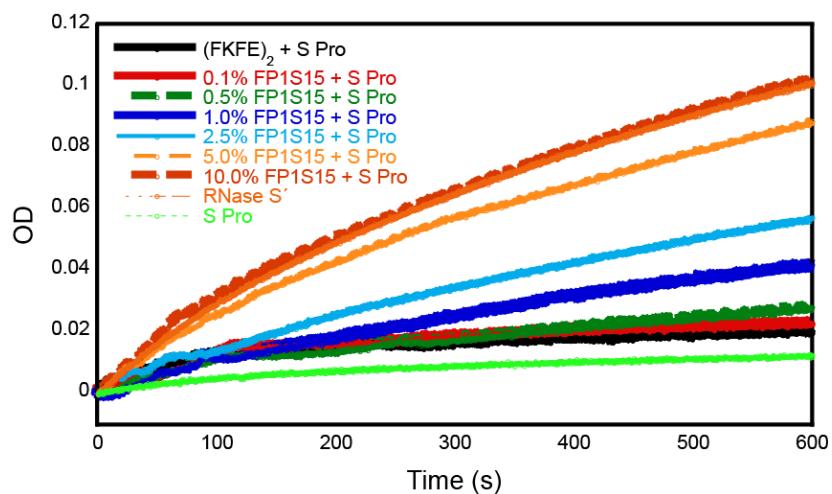

**Figure S22** Kinetics of hydrolysis of 5 mM cCMP. Total [fibril] = 100  $\mu$ M, [S-protein] = 1  $\mu$ M, [RNase S'] = 1  $\mu$ M

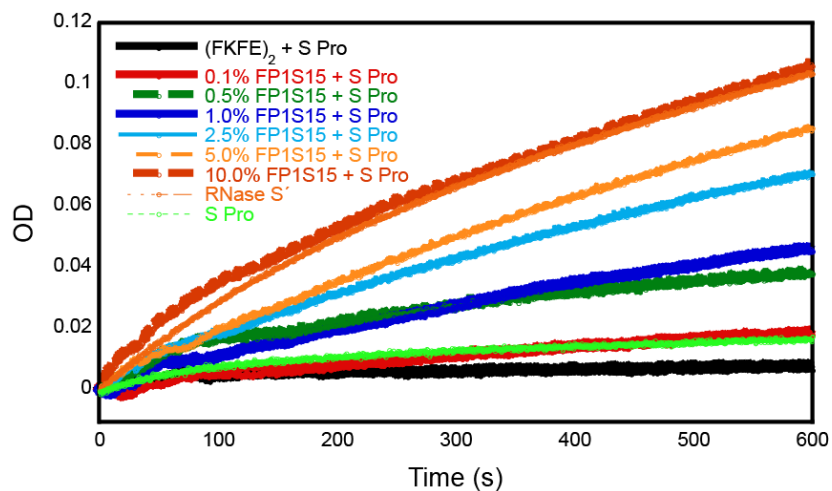

**Figure S23** Kinetics of hydrolysis of cCMP by 1  $\mu$ M RNase S'

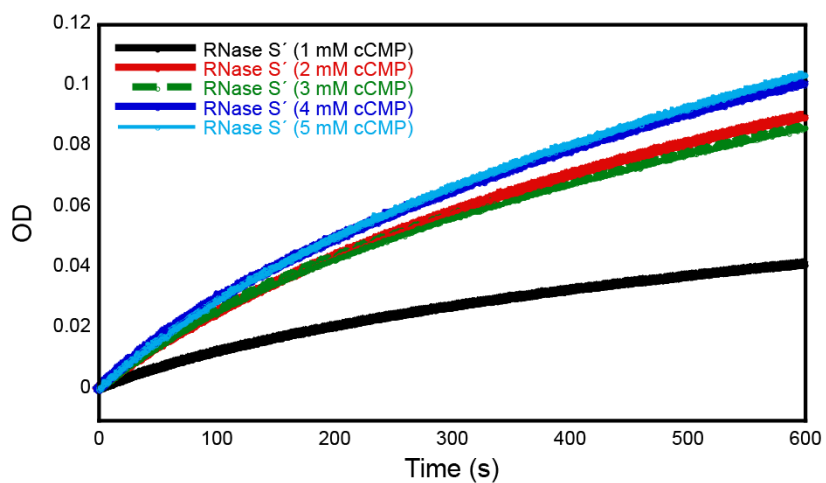



**Figure S24 TEM micrographs of fibrils with S-protein and AB-AuNP. [Total peptide] = 200  $\mu$ M, [S-Pro] = 20  $\mu$ M, AB-AuNP = 1  $\mu$ L (A) Ac-(FKFE)<sub>2</sub>-NH<sub>2</sub> (B) 0.1% FP1S15 (C) 0.5% FP1S15 (D) 1.0% FP1S15 (E) 2.5% FP1S15 (F) 5.0% FP1S15 (G) 10.0% FP1S15**

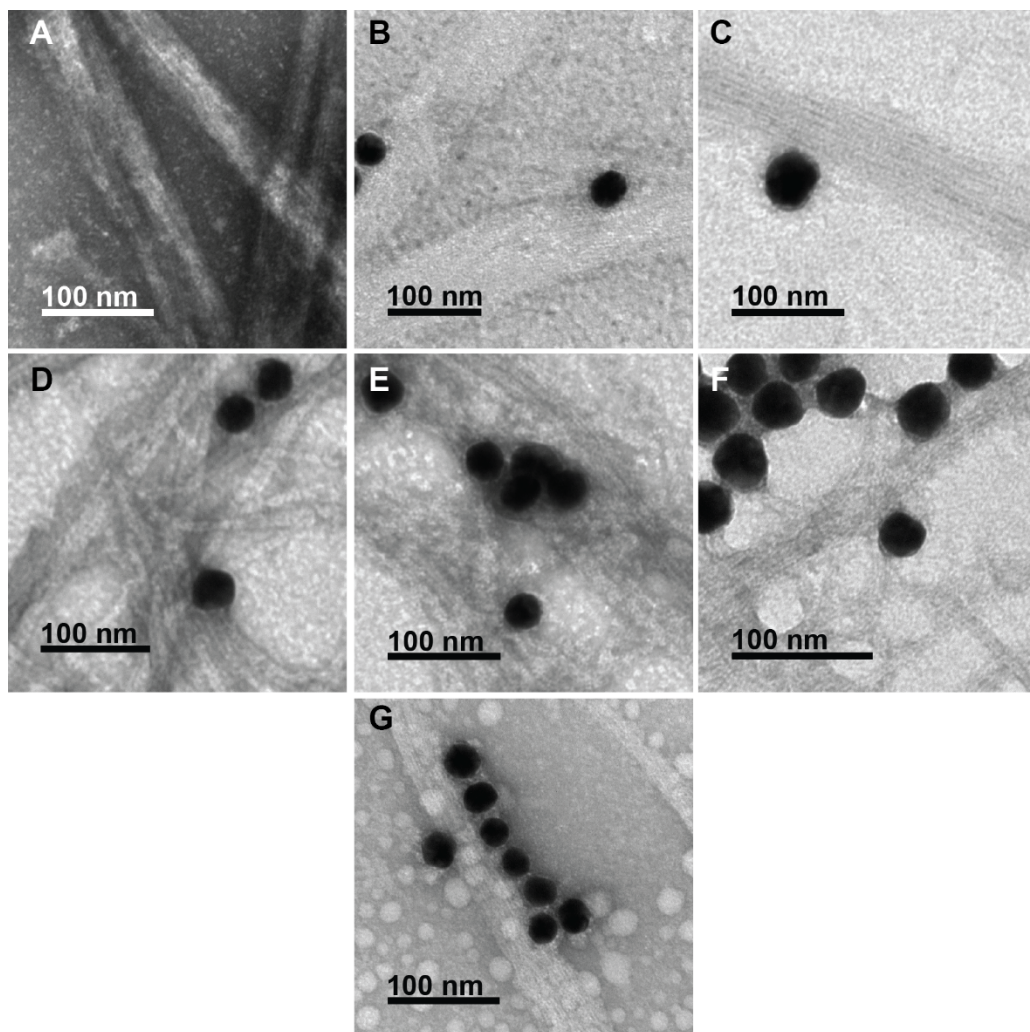

**Figure S25 Representative TEM micrographs of G11P1F fibrils treated with GFP 1-10. [Total peptide] = 65  $\mu$ M (A) 15.0% G11P1F (B) 25.0% G11P1F**

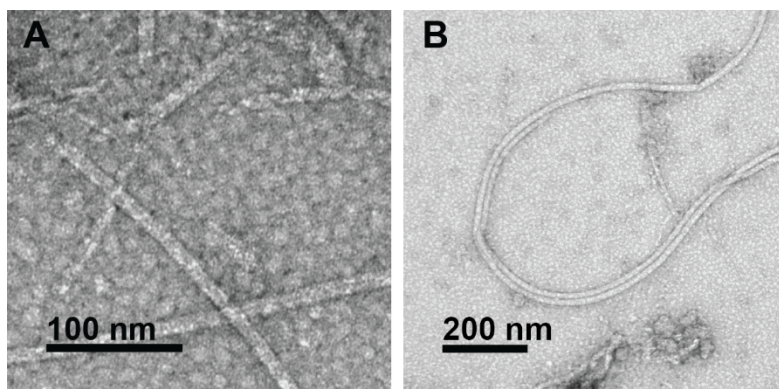

**Figure S26 TEM micrographs of fibrils with GFP 1-10 and AB-AuNP. [Total peptide] = 65  $\mu$ M, AB-AuNP = 1  $\mu$ L (A) Ac-(FKFE)<sub>2</sub>-NH<sub>2</sub> (B) 20.0% G11P1F (C) 25.0% G11P1F**

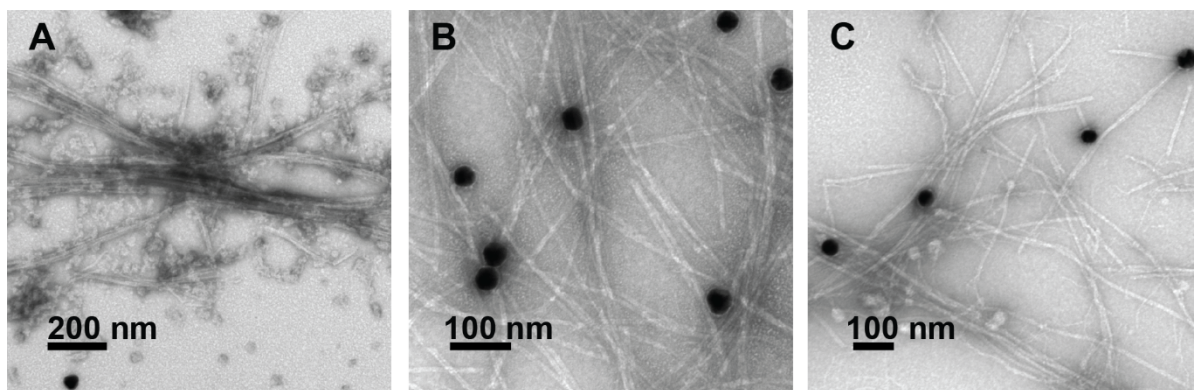

Supplement: c7ob01057e1.pdf [file c7ob01057e1.pdf]
